# Supplementary material for: A terpenoid phytoalexin plays a role in basal defense of Nicotiana benthamiana against Potato virus X
Source: PubMed Central journal article supplement (PMC4438586; doi:10.1038/srep09682), 2015-05-20
Supplement: srep09682-s1.pdf [file srep09682-s1.pdf]

## **Additional information**

### **A terpenoid phytoalexin play roles in basal defense of *Nicotiana benthamiana* against *Potato virus X***

Ran Li<sup>1\*</sup>, Chuan-Sia Tee<sup>1\*</sup>, Yu-Lin Jiang<sup>1</sup>, Xi-Yuan Jiang<sup>1</sup>, Prasanna Nori Venkatesh<sup>1</sup>, Rajani Sarojam<sup>1</sup>, Jian Ye<sup>1,2#</sup>

<sup>1</sup> Temasek Life Sciences Laboratory, National University of Singapore, Singapore 117604, Singapore.

<sup>2</sup> State Key Laboratory of Plant Genomics, Institute of Microbiology, Chinese Academy of Sciences, Beijing 100101, China.

\* Equal contribution

# Correspondence and requests for materials should be addressed to [jianye@im.ac.cn](mailto:jianye@im.ac.cn)

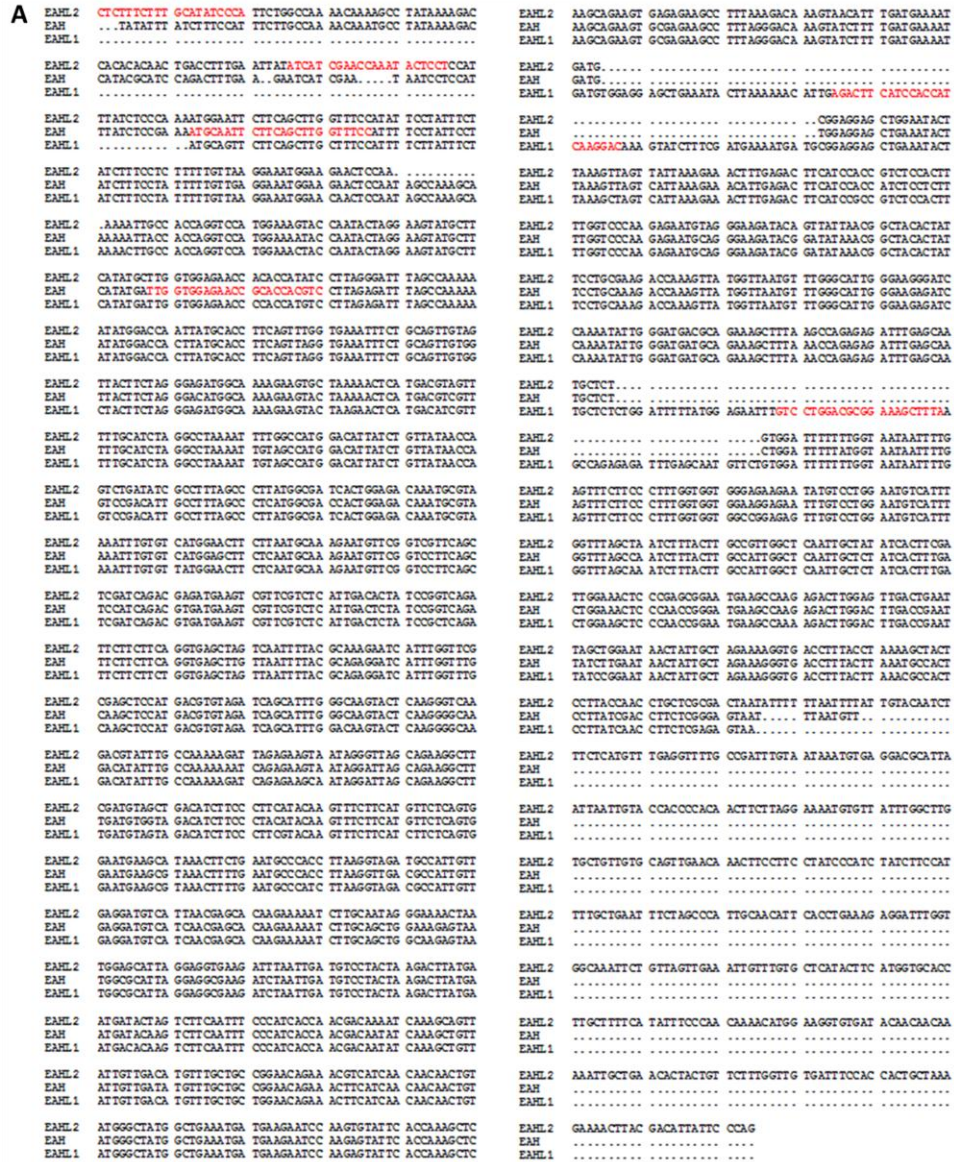

**Figure S2. Silencing *NbEAH* does not affect the expression of two *NbEAH* like genes**

(A) Alignment of *NbEAH* and *NbEAH* like sequences. Primers of each gene used for RT-qPCR analysis is labeled in red color. (B, C) Relative expression level of *NbEAHL1* (B) and *NbEAHL2* (C) genes in control and *NbEAH*-silenced *N. benthamiana* plants. Values are mean  $\pm$ SE (n=7).

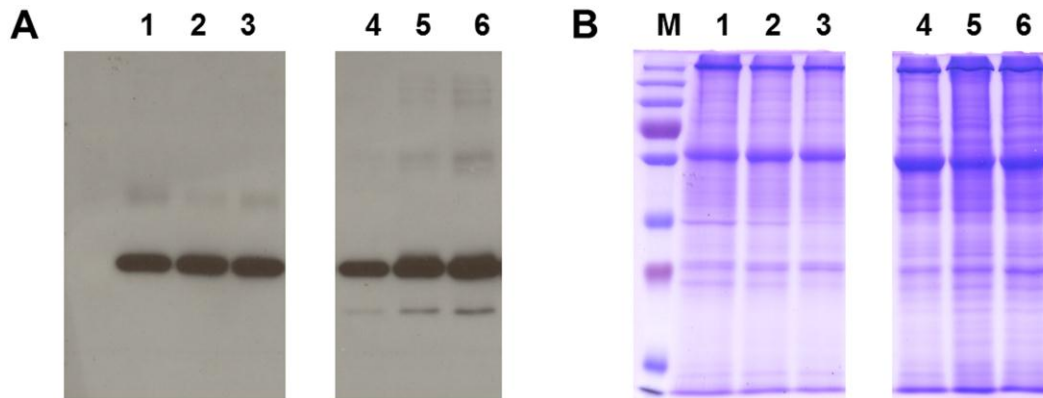

**Figure S2. Full-length blots and gels of Figure 2 (D, E) in the main text.**

(A) Immunoblot using anti-GFP antibody. (B) SDS-PAGE gel of protein loading. 1, Injected leaves of control plant; 2, Injected leaves of TPS1 VIGS plant; 3, Injected leaves of EAH VIGS plant; 4, Systemic leaves of control plant; 5, Systemic leaves of TPS1 VIGS plant; 6, Systemic leaves of EAH VIGS plant; Con, positive control; M, protein ladder.

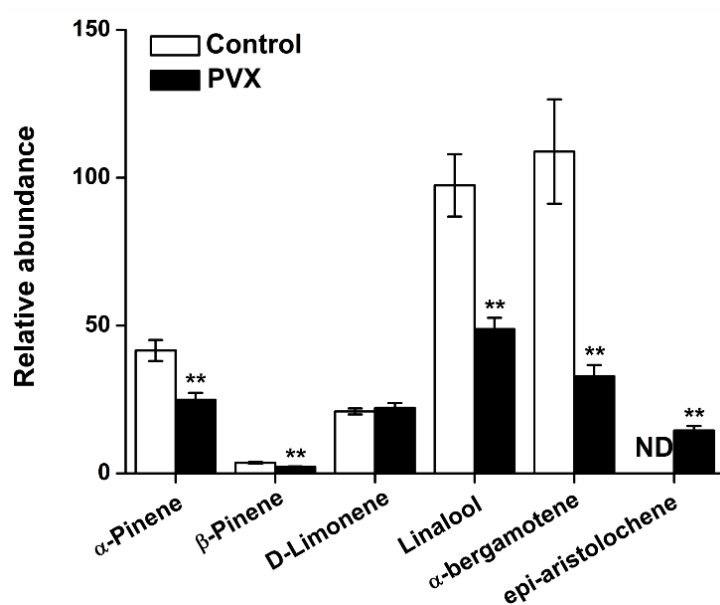

**Figure S3. Terpenoids emitted by *N. benthamiana* after PVX infection.**

Terpenes emitted by *N. benthamiana* after PVX infection. Values are mean relative amounts (% of internal standard peak area)  $\pm$ SE (n=6). ND, not detected. Asterisks indicate significant differences between different PVX-infected plants and control plants. (\*\*,  $P < 0.01$ ; Student's *t*-test).

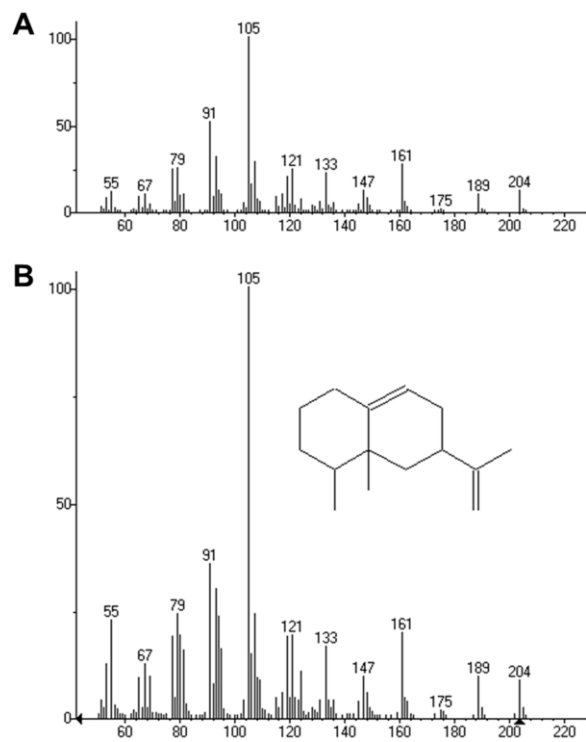

**Figure S4. Mass spectra of the epi-aristolochene**

(A). *In vitro* enzymatic reaction product of NbTPS1 by adding (*E,E*)-FPP as the substrate; (B). epi-aristolochene in NIST library.

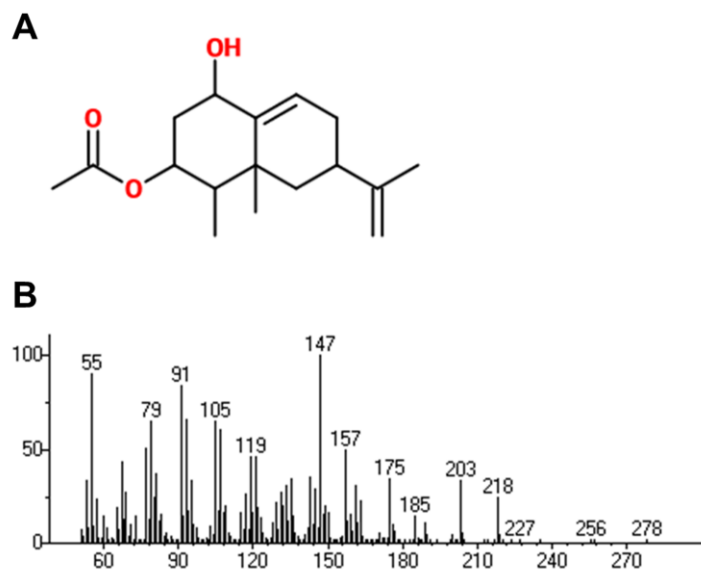

**Figure S5. Chemical structure and mass spectra of the capsidiol 3-acetate**

(A). Chemical structure of capsidiol 3-acetate; (B). capsidiol 3-acetate in NIST library.

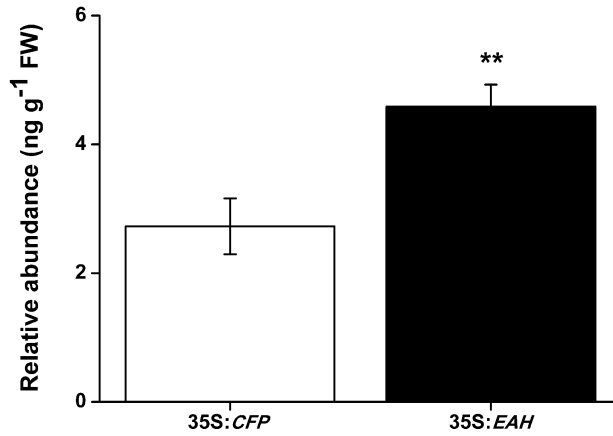

**Figure S6. *In vivo* enzymatic assays of NbEAH.**

*N. benthamiana* leaf that were infiltrated with *Agrobacterium* containing *YFP* or *EAH-YFP*. Relative amount of capsidiol 3-acetate in each plant was measured after two days of infiltration. Values are mean  $\pm$ SE (n=6). Asterisks indicate significant differences between different plants. (\*\*,  $P < 0.01$ ; Student's *t*-test).

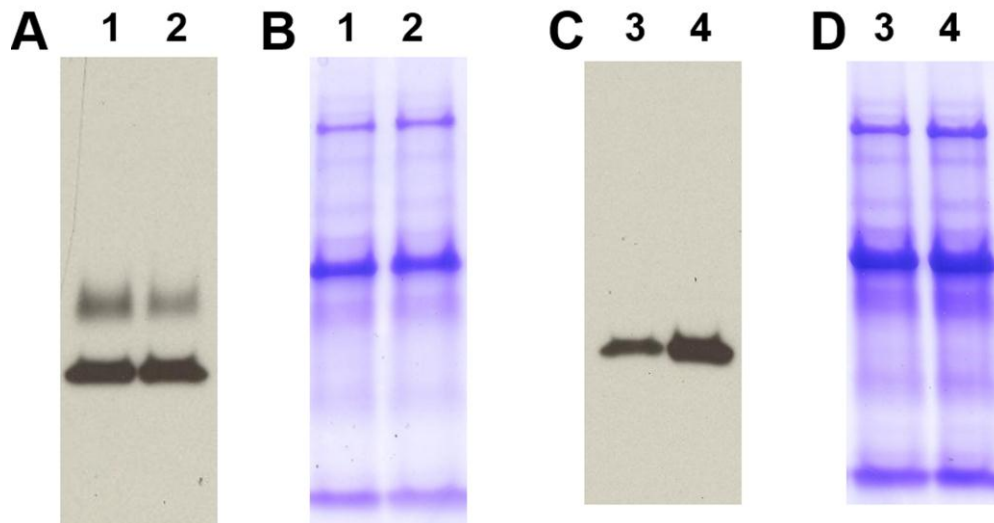

**Figure S7. Full-length blots and gel of Figure 5 (E) in the main text.**

(A, C) Immunoblot using anti-GFP antibody. (B, D) SDS-PAGE gel of protein loading. 1, Injected leaves of control plant; 2, Injected leaves of COI1 VIGS plant; 3, Systemic leaves of control plant; 4, Systemic leaves of COI1 VIGS plant.

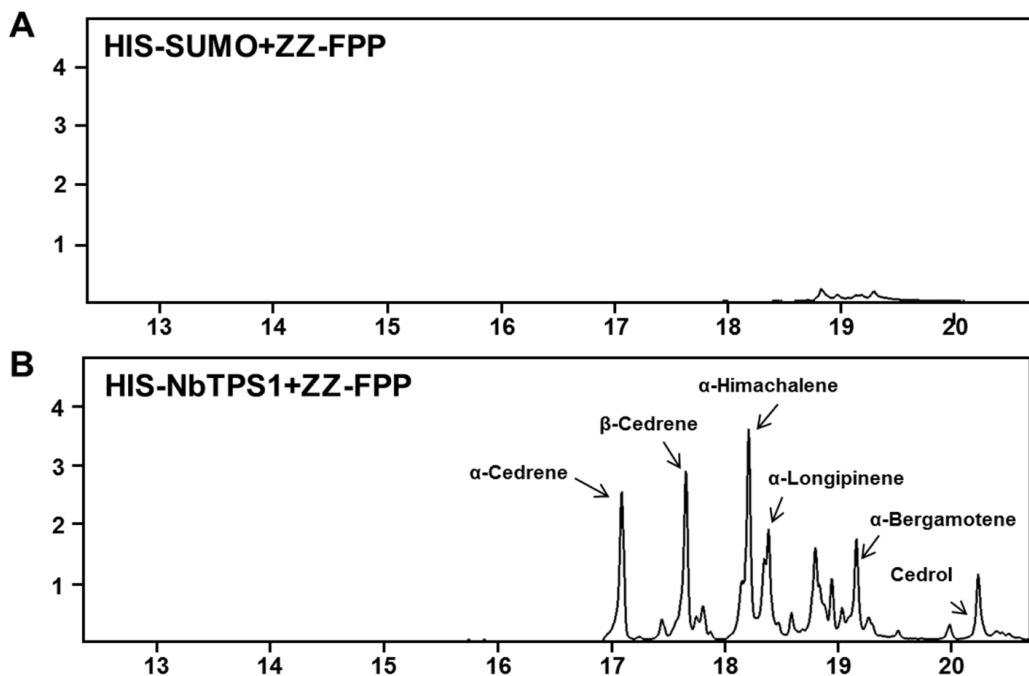

**Figure S8. *In vitro* enzymatic assays of NbTPS1.**

Chromatogram of the products obtained by incubating (Z,Z)-FPP with recombinant proteins HIS-SUMO or HIS-NbTPS1.

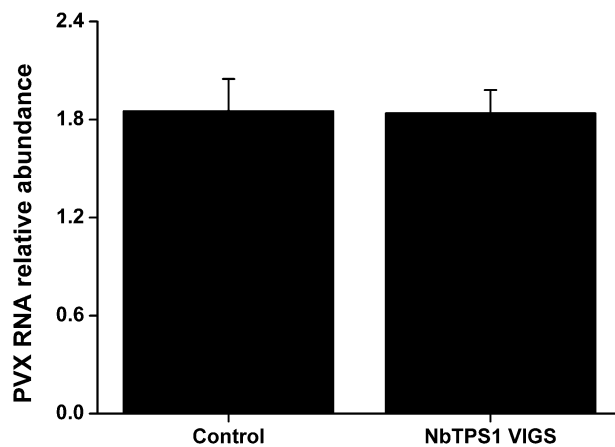

**Figure S9. Relative expression level of PVX coat protein (CP) mRNA in different plants.**

PVX RNA accumulation was measured by RT-qPCR and normalized to the level of *N. benthamiana EF1 $\alpha$*  gene. Values are mean  $\pm$ SE (n=8).

**Table S1. DNA primers used in this study.**

| Gene          | Sequence (5'-3')                      | Purpose |
|---------------|---------------------------------------|---------|
| NbEAH-F       | ATGCAATTCTTCAGCTTGGTTTCC              | RT-qPCR |
| NbEAH-R       | GACGTGGTGCGTTCTCCACCAA                | RT-qPCR |
| NbTPS1-F      | TTAAAACGAACAAAAACAATACCCTCAT          | RT-qPCR |
| NbTPS1-R      | CTCTTGAGCATACATTTGTGCAACC             | RT-qPCR |
| NbTPS5-F      | ACATTGTTCAAGCAACACATCAAGAA            | RT-qPCR |
| NbTPS5-R      | CATCAAGAGTTGTAACAAGAGCATT             | RT-qPCR |
| NbTPS3-F      | TCACCAACCCAATTACGAAAGAGA              | RT-qPCR |
| NbTPS3-R      | CGTTTATCATTTTCCATGTCTCCT              | RT-qPCR |
| NbTPS4-F      | CGGATGAATTGAAGAGGGGTGATGTT            | RT-qPCR |
| NbTPS4-R      | ATGTGCTGTTCTTGCAATATCTTT              | RT-qPCR |
| NbTPS12-F     | CGGCAGTGAACCTTGATGAGA                 | RT-qPCR |
| NbTPS12-R     | CAACTCCAACATGTGCTGCT                  | RT-qPCR |
| NbTPS38-1-F   | ACGCAATAGAGCGACTACCTGACTA             | RT-qPCR |
| NbTPS38-1-R   | TGTTTGTTATCCATGCATTTCTCA              | RT-qPCR |
| NbCOI1-F      | GAGTTTGGTGGTGGCTCATT                  | RT-qPCR |
| NbCOI1-R      | CCAAGTACGTCAAGCCCAAT                  | RT-qPCR |
| PVX-CP-F      | GCACAAGGTTTCAAGCCTGA                  | RT-qPCR |
| PVX-CP-R      | GCATCTAGGCTGGCAAAGTC                  | RT-qPCR |
| NbEAHL1-F     | AGACTTCATCCACCATCAAGGAC               | RT-qPCR |
| NbEAHL1-R     | TAAAGCTTCCGCGTCCAGGAC                 | RT-qPCR |
| NbEAHL2-F     | CTCTTCTTTGCATATCCCA                   | RT-qPCR |
| NbEAHL2-R     | AGGAGTATTTGGTTCGATGAT                 | RT-qPCR |
| sTRV2-TPS1-F  | ATAATTCTAGAGGCAACATGGTTTCAACATCTCTCCT | VIGS    |
| sTRV2-TPS1-R  | GTATGGATCCAAAATAAACTCCTAATGCCCAAAA    | VIGS    |
| sTRV2-NbEAH-F | AGGTAGGATCCGACATCTCCCTACATACAA        | VIGS    |
| sTRV2-NbEAH-R | AGGTACTCGAGCATTTTCAGCCATAGCCCATA      | VIGS    |
| sTRV2-COI1-F  | TCCGCGAATTCCTTTACTAAGAGGTTGCTATAA     | VIGS    |

|              |                                  |              |
|--------------|----------------------------------|--------------|
| sTRV2-COI1-R | TCAGTGGATCCAATGACTCAAGGACAAGTTA  | VIGS         |
| NbTPS1-YFP-F | AGTCTCCTAGGAATGGCCTCAGCAGCAGTAGC | localization |
| NbTPS1-YFP-R | AGTCGCCCGGGAAATTTGGATGGAGTCCACAA | localization |
| NbEAH-YFP-F  | CGCCTCCTAGGAATGCAATTCTTCAGCTTGGT | localization |
| NbEAH-YFP-R  | AGTAGCCCGGGA AGATAATTCGGTCAAGTC  | localization |

---
